# Supplementary material for: Characterization of Sialic Acid-Binding Immunoglobulin-Type Lectins in Fish Reveals Teleost-Specific Structures and Expression Patterns
Source: MDPI journal article supplement (doi:10.3390/cells9040836), 2020-03-31
Supplement: s1 [file s1]

**Table S1.** Primer sequences and accession codes.

| Official gene name (alias);<br>gene product                        | Organ-<br>ism <sup>a</sup> | NCBI acc. no. of seq.<br>used for annotation <sup>a</sup> | Sense, antisense primer (5'→3')                                                                              |
|--------------------------------------------------------------------|----------------------------|-----------------------------------------------------------|--------------------------------------------------------------------------------------------------------------|
| SIGLEC1 (sialoadhesin);<br>sialic acid-binding Ig-like<br>lectin 1 | <i>Cm</i>                  | XM_021564472 ( <i>Om</i> )                                | ACACCTGGTACAAGAAGAAGTAAT,<br>GCTTTTGTTGAGGCTACAGTCTT                                                         |
|                                                                    | <i>Om</i>                  | XM_021564472 ( <i>Om</i> )                                | CCTCCGTGTTTGTAATGTTTCAG,<br>CTTTTGGTGAGATGACAGTCTTTT                                                         |
|                                                                    | <i>Sl</i>                  | XM_028564630 ( <i>Pf</i> )                                | CTCTCCTTCAGTGTGTGTCCAA,<br>CACGACGGAACCAGAGTTTTGA                                                            |
| CD22 (SIGLEC2); sialic<br>acid-binding Ig-like lectin 2            | <i>Cm</i>                  | XM_021620093 ( <i>Om</i> )                                | TTTATTACAGATTTGCCTCCAGT,<br>GGATTCTCCTGCAGTTGGTTCT                                                           |
|                                                                    | <i>Om</i>                  | FR912501 ( <i>Om</i> )                                    | GACGAGATTTGAATGCCACAATG,<br>GGGTTTTCTTTAATCCCACTCC                                                           |
|                                                                    | <i>Sl</i>                  | XM_028581436 ( <i>Pf</i> )                                | GAATGTAGAACATCCTGCCAACT,<br>AACGGGGGATACTGAACATCCA                                                           |
| MAG (SIGLEC4); myelin-<br>associated glycoprotein                  | <i>Cm</i>                  | XM_014200664 ( <i>Ss</i> )                                | CACTGTGGAATACGCCCCTGT,<br>TGTAGTGGCCTTCCGTGTCGT                                                              |
|                                                                    | <i>Om</i>                  | XM_014200664 ( <i>Ss</i> )                                | MAGa: GTCCGGTATCCGGCCACACC,<br>AGCAGGGTGCAGTTCCTTTGTT                                                        |
|                                                                    | <i>Sl</i>                  | XM_028580080 ( <i>Pf</i> )                                | MAGb: AGTATGCCCCTCGCTCGGTGT,<br>AGCTGCTCCTGGTCCCCAAAT<br>ACTGTGACTTTTATCCAAAGATCC,<br>TGCTGTTGACTGTGTGGTGTGA |
| SIGLEC15 (CD33L3); sialic<br>acid-binding Ig-like lectin<br>15     | <i>Cm</i>                  | XM_021618058 ( <i>Om</i> )                                | AGTGGAAGCTGCCCCACGGAT,<br>GGAGAGGGGAGAGATGTCGG                                                               |
|                                                                    | <i>Om</i>                  | XM_021618058 ( <i>Om</i> )                                | CCTCCGTGTTTGTAATGTTTCAG,<br>CTTTTGGTGAGATGACAGTCTTTT                                                         |
|                                                                    | <i>Sl</i>                  | MF377634 ( <i>Of</i> )                                    | AGATTGGAGGGCCGATGTTGTA,<br>TTTCCAAGACCTGCGTGCTATC                                                            |
| LYN; tyrosine-protein<br>kinase type Lyn                           | <i>Cm</i>                  | XM_021613293 ( <i>Om</i> )                                | TTGAAGAGTAAGGTGAATGGTGG,<br>GTGCCAAAAGTTGTCTCTCTGC                                                           |

|                                                                   |           |                            |                                                     |
|-------------------------------------------------------------------|-----------|----------------------------|-----------------------------------------------------|
| PTPN6 (SHP1); tyrosine-protein phosphatase non-receptor type 6    | <i>Cm</i> | XM_031786056 ( <i>Ok</i> ) | ACGAGGGAGACAAGAAGACCAA,<br>GTCTCATCAAAGGGAAGGATGTT  |
| PTPN11 (SHP2); tyrosine-protein phosphatase non-receptor type 11  | <i>Cm</i> | XM_021602892 ( <i>Om</i> ) | CTATACAGCCGCAAGGAGGGA,<br>CAACTCCGGCATGATGTCCGTT    |
| SYK; spleen-associated tyrosine kinase                            | <i>Cm</i> | XM_021601579 ( <i>Om</i> ) | CACAGAGGTGTACGAGAGTCC,<br>CGGCTTCTCTGTCTTCCTCATT    |
| ZAP70; zeta chain of T-cell receptor-associated protein kinase 70 | <i>Cm</i> | XM_014169597 ( <i>Ss</i> ) | CTATTACAAGGCACGCACAGCA,<br>CTTGTATGGTTTTTCCTCCGTAAG |

<sup>a</sup> *Coregonus maraena* (*Cm*); *Oncorhynchus kisutch* (*Ok*); *Oncorhynchus mykiss* (*Om*); *Oplegnathus fasciatus* (*Of*); *Perca flavescens* (*Pf*); *Salmo salar* (*Ss*); *Sander lucioperca* (*Sl*).
